# Supplementary material for: A non-rare earth ion doped broadband emission phosphor located in NIR-II for ethanol concentration detection
Source: Royal Society of Chemistry journal article supplement (doi:10.1039/d2dt02386e), 2022-01-01
Supplement: d2dt02386e1.pdf [file d2dt02386e1.pdf]

**A non-rare earth doped broadband emission phosphor located in  
NIR-II for ethanol concentration detection**

Zejun Ye<sup>1</sup>, Zhijun Wang\*<sup>1</sup>, Huifang Yang<sup>1</sup>, Xiaoxue Huo<sup>1</sup>, Yu Wang<sup>1</sup>, Qian Wu<sup>1</sup>, Dawei Wang<sup>2</sup>,  
Jinxin Zhao<sup>2</sup>, Hao Suo<sup>1</sup>, Panlai Li\*<sup>1</sup>

<sup>1</sup>*Hebei Key Laboratory of Optic-electronic Information and Materials, College of Physics Science  
& Technology, Hebei University, Baoding 071002, China*

<sup>2</sup>*Hebei Key Laboratory of Semiconductor Lighting and Display Critical Materials, Baoding,  
071000, China*

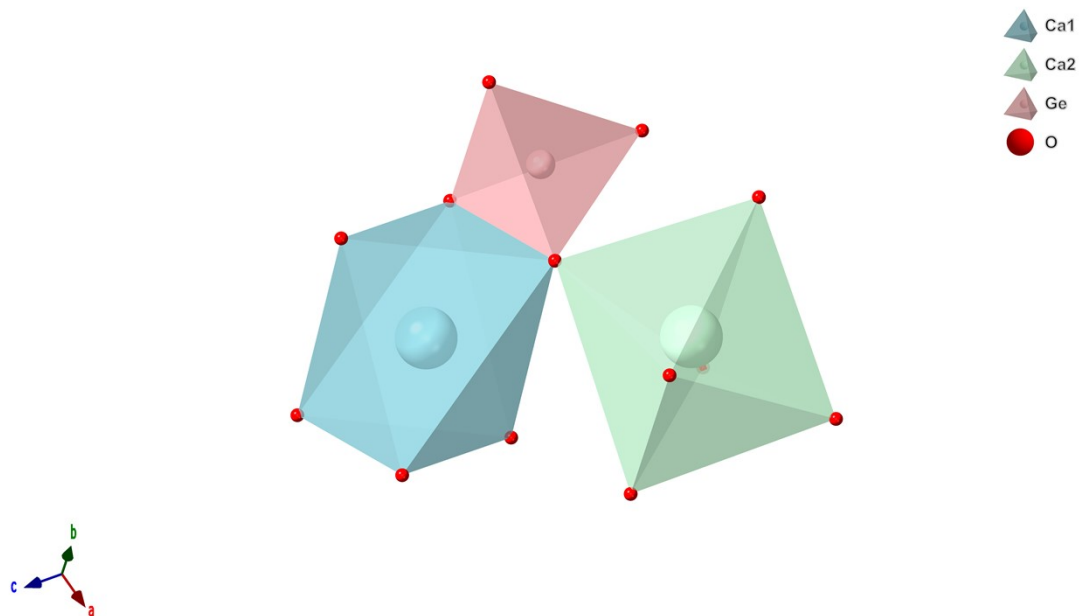

**Figure S1.** Visualization of  $\text{Ca}^{2+}$  and  $\text{Ge}^{4+}$  polyhedra in  $\text{Ca}_2\text{GeO}_4$  structures.

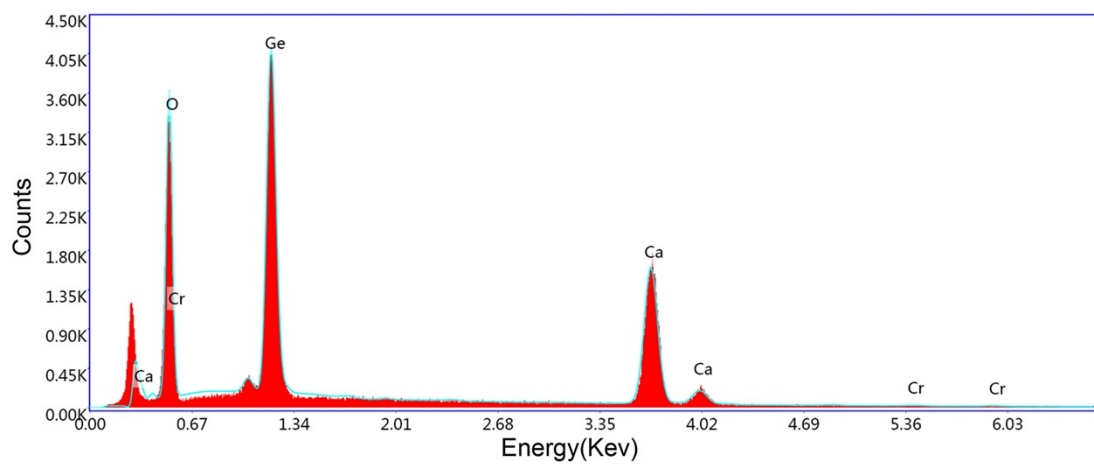

**Figure S2.** EDS spectrum of  $\text{Ca}_2\text{GeO}_4: 0.003\text{Cr}$ .

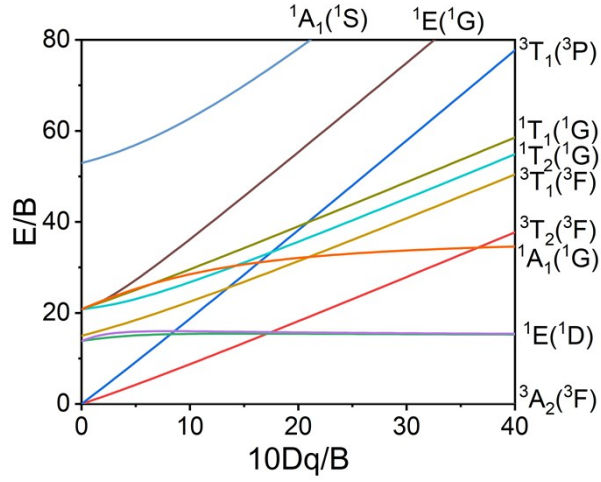

**Figure S3.** T-S diagram for  $\text{Cr}^{4+}$  in the tetrahedral coordination environment.

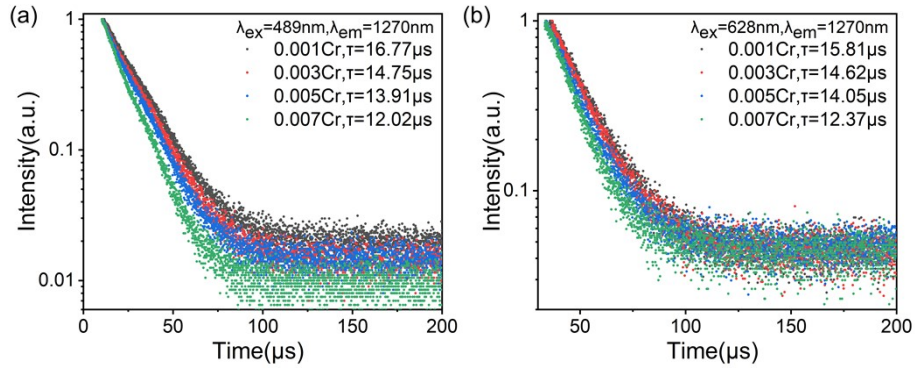

**Figure S4.** The decay curves of  $\text{Ca}_2\text{GeO}_4:\text{xCr}$  ( $\lambda_{\text{ex}}=489$  nm (a);  $\lambda_{\text{ex}}=628$  nm (b);  $\lambda_{\text{em}}=1270$  nm).

**Table S1.** The lifetimes of  $\text{Ca}_2\text{GeO}_4:\text{xCr}$  ( $\lambda_{\text{ex}}=489$  nm ;  $\lambda_{\text{ex}}=628$  nm).

| $\lambda_{\text{ex}}=489\text{nm}$ | 0.001Cr             | 0.003Cr             | 0.005Cr             | 0.007Cr             |
|------------------------------------|---------------------|---------------------|---------------------|---------------------|
| $\tau$                             | 16.77 $\mu\text{s}$ | 14.75 $\mu\text{s}$ | 13.91 $\mu\text{s}$ | 12.02 $\mu\text{s}$ |
| $\tau_1$                           | 2.69 $\mu\text{s}$  | 3.09 $\mu\text{s}$  | 3.74 $\mu\text{s}$  | 5.67 $\mu\text{s}$  |
| $\tau_2$                           | 17.31 $\mu\text{s}$ | 16.63 $\mu\text{s}$ | 15.16 $\mu\text{s}$ | 13.26 $\mu\text{s}$ |

| $\lambda_{\text{ex}}=628\text{nm}$ | 0.001Cr                | 0.003Cr                | 0.005Cr                | 0.007Cr                |
|------------------------------------|------------------------|------------------------|------------------------|------------------------|
| $\tau$                             | 15.81 $\mu\text{s}$    | 14.62 $\mu\text{s}$    | 14.05 $\mu\text{s}$    | 12.37 $\mu\text{s}$    |
| $\tau_1$                           | 15.81264 $\mu\text{s}$ | 14.62093 $\mu\text{s}$ | 14.05404 $\mu\text{s}$ | 12.37425 $\mu\text{s}$ |
| $\tau_2$                           | 15.81028 $\mu\text{s}$ | 14.62262 $\mu\text{s}$ | 14.05331 $\mu\text{s}$ | 12.37541 $\mu\text{s}$ |

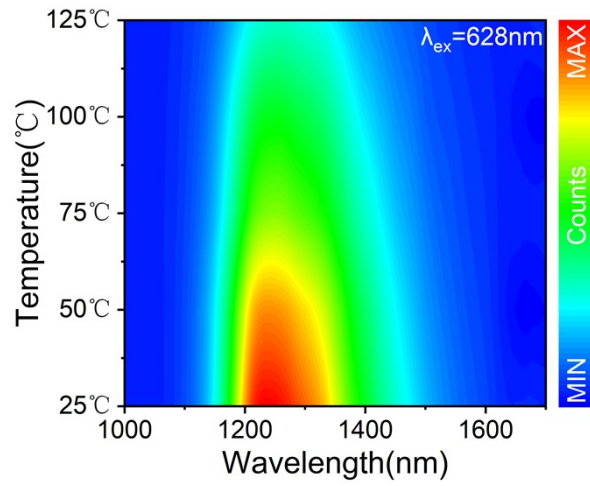

**Figure S5.** Temperature-dependent PL spectra of  $\text{Ca}_2\text{GeO}_4:0.003\text{Cr}$  ( $\lambda_{\text{ex}}=628$  nm).

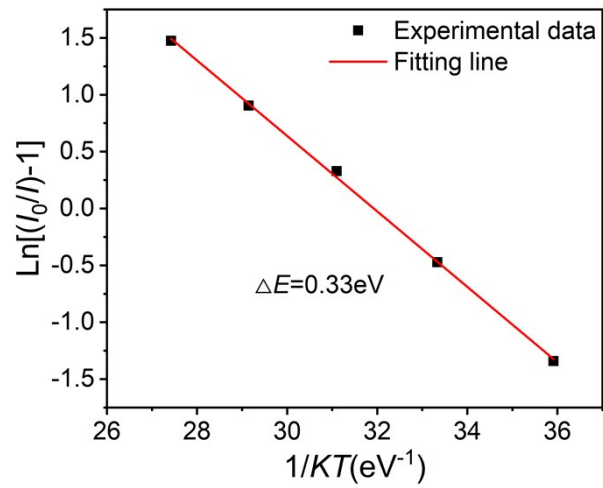

**Figure S6.** The plots of  $\text{Ln} (I/I_0-1)$  versus  $1/KT$ .
